# Supplementary material
Source: HighWire-hosted journal article supplement (https://openres.ersjournals.com/content/9/3/00011-2023)
Supplement: inline-supplementary-material-1 [file inline-supplementary-material-1.pdf]

**Table S1: Respiratory symptoms and their definitions**

| <b>Respiratory symptoms</b>                      | <b>Questions from questionnaire</b>                                                                                                                                  |
|--------------------------------------------------|----------------------------------------------------------------------------------------------------------------------------------------------------------------------|
| Wheezing                                         | Have you had wheezing or whistling in your chest at any time in the last 12 months?                                                                                  |
| Wheezing with shortness of breath                | Have you been at all breathless when the wheezing noise was present?                                                                                                 |
| Wheezing without cold                            | Have you had this wheezing or whistling when you did not have a cold?                                                                                                |
| Awoken with tightness in chest                   | Have you woken up with a feeling of tightness in your chest at any time in the last 12 months?                                                                       |
| Awoken with shortness of breath                  | Have you been woken by an attack of shortness of breath at any time in the last 12 months?                                                                           |
| Awoken with an attack of cough                   | Have you been woken by an attack of coughing at any time in the last 12 months?                                                                                      |
| Shortness of breath when active                  | Do you get breathless with strenuous exercise?                                                                                                                       |
| Difficult breathing when walking on ground level | Do you get short of breath when hurrying on the level or walking up a slight hill?                                                                                   |
| Breathlessness                                   | Do you walk slower than people of the same age on the level because of breathlessness, or do you have to stop for breath when walking on your own pace on the level? |
| Shortness of breath while walking                | Do you stop for breath after walking about 100 metres or after a few minutes on the level?                                                                           |
| Phlegm                                           | Do you usually bring up phlegm or do you have phlegm in your lungs which you have difficulty bringing up?                                                            |
| Nasal allergies                                  | Do you have any nasal allergies including hay fever?                                                                                                                 |
| Attack of asthma                                 | Have you had an attack of asthma in the last 12 months?                                                                                                              |
| Currently taking asthma medication               | Are you currently taking any medicine (including inhalers, aerosols, or tablets) for asthma?                                                                         |

**Table S2: Questions used to create a new variable, “asthma symptoms score.”**

| <b>Asthma-like symptoms</b>        | <b>Definition</b>                                                                                                                                                    |
|------------------------------------|----------------------------------------------------------------------------------------------------------------------------------------------------------------------|
| Wheezing                           | Have you had wheezing and whistling in your chest at any time in the last 12 months?                                                                                 |
| Awoken with Tightness in the chest | Have you woken up with a feeling of tightness in your chest at any time in the last 12 months?                                                                       |
| Awoken with Shortness of breath    | Have you been woken by an attack of shortness of breath at any time in the last 12 months?                                                                           |
| Awoken with an Attack of cough     | Have you been woken by an attack of coughing at any time in the last 12 months?                                                                                      |
| Breathlessness                     | Do you walk slower than people of the same age on the level because of breathlessness, or do you have to stop for breath when walking on your own pace on the level? |

**Table S3: Distribution of study participants with doctor diagnosed asthma by age according to TB status**

| <b>Age group</b> | <b>With TB</b> | <b>Without TB</b> |
|------------------|----------------|-------------------|
| <10              | 0              | 212               |
| 10-19            | 0              | 182               |
| 20-29            | 1              | 150               |
| 30-39            | 1              | 164               |
| 40-49            | 1              | 144               |
| 50-59            | 5              | 138               |
| 60-69            | 0              | 66                |
| >69              | 2              | 17                |
| Total            | 10             | 1 073             |
